# Supplementary material for: Determination and evaluation of the thermophysical properties of an alkali carbonate eutectic molten salt
Source: Royal Society of Chemistry journal article supplement (doi:10.1039/c5fd00236b), 2016-01-01
Supplement: c5fd00236b1.pdf [file c5fd00236b1.pdf]

Table S1. The thermal diffusivity ( $\times 10^{-3}$  cm<sup>2</sup>/s) of the LiNaKCO<sub>3</sub> molten salt

| No.     | 450 °C | 500 °C | 550 °C | 600 °C |
|---------|--------|--------|--------|--------|
| 1       | 1.19   | 1.31   | 1.30   | 1.49   |
| 2       | 1.33   | 1.30   | 1.47   | 1.54   |
| 3       | 1.42   | 1.34   | 1.52   | 1.59   |
| 4       | 1.22   | 1.56   | 1.60   | 1.57   |
| 5       | 1.31   | 1.50   | 1.40   | 1.46   |
| 6       | 1.46   | 1.36   | 1.40   | 1.47   |
| 7       | 1.45   | 1.50   | 1.35   | 1.55   |
| 8       | 1.32   | 1.35   | 1.38   | 1.50   |
| 9       | 1.35   | 1.51   | 1.40   | 1.47   |
| 10      | 1.44   | 1.39   | 1.46   | 1.66   |
| 11      | 1.36   | 1.28   | 1.37   | 1.34   |
| 12      | 1.44   | 1.30   | 1.36   | 1.63   |
| 13      | 1.46   | 1.38   | 1.58   | 1.55   |
| 14      | 1.22   | 1.45   | 1.41   | 1.42   |
| 15      | 1.43   | 1.33   | 1.59   | 1.53   |
| Average | 1.36   | 1.39   | 1.44   | 1.52   |
| RSD(%)  | 6.881  | 6.506  | 1.685  | 1.389  |
